# Supplementary material for: The sex of specific neurons controls female body growth in Drosophila
Source: PLoS Biol. 2017 Oct 4;15(10):e2002252. doi: 10.1371/journal.pbio.2002252 (PMC5627897; doi:10.1371/journal.pbio.2002252)
Supplement: S1 Data — In this Excel file, separate worksheets contain the data used in each figure panel as indicated. (XLSX) [file pbio.2002252.s018.xlsx]

## Sheet: Fig 1A
	mean body mass (mg) - measurements						mean body mass (mg) - LOWESS calculated line of best fit
time ALH (h)	Female	Male				time ALH (h)	Female	Male
0	0.010385	0.01002				0	0.0101785	0.00974879
3	0.01077	0.01047				0.5	0.0103731	0.00998757
6	0.01265	0.01291				1	0.0105677	0.0102263
9	0.01584	0.01633				1.5	0.0107623	0.0104651
12	0.01878	0.01824				2	0.0109569	0.0107039
15	0.02275	0.0249				2.5	0.0111514	0.0109427
18	0.02936	0.03037				3	0.011346	0.0111815
21	0.04122	0.04192				3.5	0.0117131	0.0115827
24	0.05587	0.0554				4	0.0120803	0.0119839
27	0.06017	0.059305				4.5	0.0124474	0.0123851
30	0.07378	0.07234				5	0.0128145	0.0127863
33	0.088125	0.08572				5.5	0.0131816	0.0131876
36	0.14515	0.12825				6	0.0135487	0.0135888
39	0.174	0.165				6.5	0.0140062	0.0140799
42	0.270795	0.23243				7	0.0144637	0.0145711
45	0.2851	0.24791				7.5	0.0149212	0.0150623
48	0.371243	0.327573				8	0.0153787	0.0155534
51	0.467	0.388				8.5	0.0158362	0.0160446
54	0.599753	0.511473				9	0.0162937	0.0165358
57	0.84553	0.723913				9.5	0.0168768	0.0171731
60	0.923975	0.79331				10	0.01746	0.0178104
63	1.13719	0.9666				10.5	0.0180432	0.0184477
66	1.40367	1.10272				11	0.0186263	0.019085
72	1.67639	1.29215				11.5	0.0192095	0.0197223
76	1.84327	1.51011				12	0.0197926	0.0203596
78	1.97779	1.54248				12.5	0.0206753	0.0213277
81	2.0965	1.63557				13	0.021558	0.0222959
84	2.18104	1.67845				13.5	0.0224407	0.023264
87	2.19734	1.70673				14	0.0233234	0.0242322
90	2.19447	1.72524				14.5	0.0242061	0.0252003
93	2.13911	1.61927				15	0.0250888	0.0261685
96	2.003	1.494				15.5	0.0264466	0.0274667
						16	0.0278044	0.0287649
						16.5	0.0291622	0.0300632
						17	0.03052	0.0313614
						17.5	0.0318778	0.0326596
						18	0.0332356	0.0339579
						18.5	0.0348978	0.0355455
						19	0.03656	0.0371332
						19.5	0.0382221	0.0387209
						20	0.0398843	0.0403085
						20.5	0.0415464	0.0418962
						21	0.0432086	0.0434839
						21.5	0.0448837	0.0450534
						22	0.0465589	0.046623
						22.5	0.048234	0.0481925
						23	0.0499092	0.0497621
						23.5	0.0515843	0.0513316
						24	0.0532595	0.0529012
						24.5	0.0549147	0.0544579
						25	0.05657	0.0560145
						25.5	0.0582252	0.0575712
						26	0.0598805	0.0591279
						26.5	0.0615358	0.0606845
						27	0.063191	0.0622412
						27.5	0.0661172	0.0647848
						28	0.0690434	0.0673284
						28.5	0.0719696	0.0698721
						29	0.0748957	0.0724157
						29.5	0.0778219	0.0749593
						30	0.0807481	0.077503
						30.5	0.0852398	0.0813963
						31	0.0897315	0.0852897
						31.5	0.0942232	0.0891831
						32	0.0987149	0.0930765
						32.5	0.103207	0.0969699
						33	0.107698	0.100863
						33.5	0.114793	0.106866
						34	0.121889	0.112868
						34.5	0.128984	0.118871
						35	0.136079	0.124873
						35.5	0.143174	0.130876
						36	0.150269	0.136878
						36.5	0.158123	0.143564
						37	0.165978	0.15025
						37.5	0.173832	0.156935
						38	0.181686	0.163621
						38.5	0.18954	0.170306
						39	0.197395	0.176992
						39.5	0.206818	0.184588
						40	0.216241	0.192184
						40.5	0.225664	0.199781
						41	0.235087	0.207377
						41.5	0.24451	0.214973
						42	0.253933	0.222569
						42.5	0.263264	0.230408
						43	0.272595	0.238247
						43.5	0.281926	0.246087
						44	0.291257	0.253926
						44.5	0.300587	0.261765
						45	0.309918	0.269604
						45.5	0.323792	0.280963
						46	0.337666	0.292322
						46.5	0.35154	0.303681
						47	0.365414	0.315039
						47.5	0.379288	0.326398
						48	0.393162	0.337757
						48.5	0.41226	0.353433
						49	0.431357	0.369108
						49.5	0.450455	0.384784
						50	0.469552	0.40046
						50.5	0.48865	0.416135
						51	0.507748	0.431811
						51.5	0.531749	0.4527
						52	0.555751	0.473588
						52.5	0.579753	0.494477
						53	0.603755	0.515366
						53.5	0.627757	0.536255
						54	0.651759	0.557143
						54.5	0.678445	0.579975
						55	0.705131	0.602806
						55.5	0.731816	0.625637
						56	0.758502	0.648468
						56.5	0.785188	0.671299
						57	0.811874	0.69413
						57.5	0.838792	0.715149
						58	0.86571	0.736168
						58.5	0.892629	0.757186
						59	0.919547	0.778205
						59.5	0.946465	0.799223
						60	0.973383	0.820242
						60.5	1.00704	0.844202
						61	1.04069	0.868163
						61.5	1.07435	0.892123
						62	1.108	0.916084
						62.5	1.14166	0.940044
						63	1.17532	0.964005
						63.5	1.20654	0.983564
						64	1.23776	1.00312
						64.5	1.26899	1.02268
						65	1.30021	1.04224
						65.5	1.33143	1.0618
						66	1.36266	1.08136
						66.5	1.38786	1.10077
						67	1.41307	1.12017
						67.5	1.43828	1.13957
						68	1.46348	1.15897
						68.5	1.48869	1.17837
						69	1.51389	1.19777
						69.5	1.5391	1.21718
						70	1.56431	1.23658
						70.5	1.58951	1.25598
						71	1.61472	1.27538
						71.5	1.63992	1.29478
						72	1.66513	1.31419
						72.5	1.6893	1.33441
						73	1.71347	1.35463
						73.5	1.73765	1.37485
						74	1.76182	1.39508
						74.5	1.78599	1.4153
						75	1.81017	1.43552
						75.5	1.83434	1.45574
						76	1.85851	1.47597
						76.5	1.88228	1.48962
						77	1.90605	1.50327
						77.5	1.92982	1.51692
						78	1.95359	1.53058
						78.5	1.9713	1.54315
						79	1.98902	1.55572
						79.5	2.00673	1.56829
						80	2.02445	1.58087
						80.5	2.04216	1.59344
						81	2.05988	1.60601
						81.5	2.07121	1.61409
						82	2.08255	1.62218
						82.5	2.09388	1.63026
						83	2.10521	1.63835
						83.5	2.11655	1.64643
						84	2.12788	1.65452
						84.5	2.13257	1.65808
						85	2.13727	1.66163
						85.5	2.14196	1.66519
						86	2.14665	1.66875
						86.5	2.15135	1.67231
						87	2.15604	1.67587
						87.5	2.15394	1.67176
						88	2.15183	1.66766
						88.5	2.14973	1.66355
						89	2.14763	1.65945
						89.5	2.14552	1.65534
						90	2.14342	1.65124
						90.5	2.13598	1.64002
						91	2.12855	1.62881
						91.5	2.12111	1.6176
						92	2.11367	1.60638
						92.5	2.10624	1.59517
						93	2.0988	1.58396
						93.5	2.08718	1.5695
						94	2.07555	1.55505
						94.5	2.06393	1.5406
						95	2.05231	1.52614
						95.5	2.04068	1.51169
						96	2.02906	1.49724

## Sheet: Fig 1B
mean body mass (mg) at L1 hatching
female	male
0.0125	0.01233
0.01175	0.01181
0.01125	0.01158

## Sheet: Fig 1C
	mean larval body mass (mg) with replicate measurements where available
time ALH (h)	Female				Male
0	0.0105	0.01008	0.01046	0.0105	0.00971	0.01039	0.00956	0.01042
3	0.01077				0.01047
6	0.01265				0.01291
9	0.01584				0.01633
12	0.01878				0.01824
15	0.02275				0.0249
18	0.02936				0.03037
21	0.04122				0.04192
24	0.0556	0.05614			0.05634	0.05446
27	0.06256	0.05778			0.06058	0.05803

## Sheet: Fig 1D
	mean larval body mass (mg) with replicate measurements where available
time ALH (h)	Female			Male
30	0.07378			0.07234
33	0.088125			0.08572
36	0.1383	0.152		0.1295	0.127
39	0.173	0.175		0.171	0.159
42	0.27882	0.26277		0.22238	0.24248
45	0.2728	0.2974		0.24893	0.24689
48	0.35978	0.3722	0.38175	0.30988	0.31336	0.35948

## Sheet: Fig 1E
	mean body mass (mg)					LOWESS calculated line of best fit
time ALH (h)	Female	Male	F:M ratio		time ALH (h)	F:M ratio
0	0.010385	0.01002	1.03643		2.84444	1.01605
3	0.01077	0.01047	1.02865		3.55556	1.0109
6	0.01265	0.01291	0.979861		4.26667	1.00641
9	0.01584	0.01633	0.969994		4.97778	1.00232
12	0.01878	0.01824	1.02961		5.68889	0.998588
15	0.02275	0.0249	0.913655		6.4	0.995209
18	0.02936	0.03037	0.966743		7.11111	0.992174
21	0.04122	0.04192	0.983302		7.82222	0.989416
24	0.05587	0.0554	1.00848		8.53333	0.986897
27	0.06017	0.059305	1.01459		9.24445	0.98406
30	0.07378	0.07234	1.01991		9.95556	0.980535
33	0.088125	0.08572	1.02806		10.6667	0.977354
36	0.14515	0.12825	1.13177		11.3778	0.974467
39	0.174	0.165	1.05455		12.0889	0.971646
42	0.270795	0.23243	1.16506		12.8	0.967881
45	0.2851	0.24791	1.15001		13.5111	0.964562
48	0.371243	0.327573	1.13331		14.2222	0.961613
51	0.467	0.388	1.20361		14.9333	0.958976
54	0.599753	0.511473	1.1726		15.6444	0.96398
57	0.84553	0.723913	1.168		16.3556	0.969074
60	0.923975	0.79331	1.16471		17.0667	0.973571
63	1.13719	0.9666	1.17648		17.7778	0.977571
66	1.40367	1.10272	1.27292		18.4889	0.981712
72	1.67639	1.29215	1.29737		19.2	0.985611
76	1.84327	1.51011	1.22062		19.9111	0.98907
78	1.97779	1.54248	1.28222		20.6222	0.992158
81	2.0965	1.63557	1.28182		21.3333	0.995399
84	2.18104	1.67845	1.29944		22.0445	0.99883
87	2.19734	1.70673	1.28746		22.7556	1.00195
90	2.19447	1.72524	1.27198		23.4667	1.0048
93	2.13911	1.61927	1.32103		24.1778	1.00736
96	2.025	1.494	1.35542		24.8889	1.00958
					25.6	1.01164
					26.3111	1.01354
					27.0222	1.01551
					27.7333	1.0229
					28.4444	1.02953
					29.1556	1.0355
					29.8667	1.04091
					30.5778	1.04801
					31.2889	1.05469
					32	1.06058
					32.7111	1.06581
					33.4222	1.07323
					34.1333	1.08135
					34.8444	1.08834
					35.5556	1.09441
					36.2667	1.09978
					36.9778	1.10454
					37.6889	1.10873
					38.4	1.11245
					39.1111	1.11646
					39.8222	1.12353
					40.5333	1.12984
					41.2445	1.1355
					41.9556	1.14061
					42.6667	1.14313
					43.3778	1.14529
					44.0889	1.14725
					44.8	1.14905
					45.5111	1.1525
					46.2222	1.15624
					46.9333	1.1596
					47.6444	1.16263
					48.3556	1.16577
					49.0667	1.16893
					49.7778	1.17172
					50.4889	1.17422
					51.2	1.17535
					51.9111	1.17368
					52.6222	1.17222
					53.3333	1.17092
					54.0444	1.16982
					54.7556	1.16976
					55.4667	1.16972
					56.1778	1.16967
					56.8889	1.16963
					57.6	1.17352
					58.3111	1.1778
					59.0222	1.18175
					59.7333	1.1854
					60.4445	1.19222
					61.1556	1.20049
					61.8667	1.20813
					62.5778	1.21523
					63.2889	1.22357
					64	1.23391
					64.7111	1.24369
					65.4222	1.25295
					66.1333	1.26032
					66.8444	1.26128
					67.5556	1.26219
					68.2667	1.26306
					68.9778	1.2639
					69.6889	1.26469
					70.4	1.26545
					71.1111	1.26618
					71.8222	1.26687
					72.5333	1.26588
					73.2445	1.2644
					73.9556	1.26297
					74.6667	1.2616
					75.3778	1.26029
					76.0889	1.25997
					76.8	1.26621
					77.5111	1.27229
					78.2222	1.27686
					78.9333	1.27838
					79.6445	1.27986
					80.3556	1.28132
					81.0667	1.28269
					81.7778	1.28353
					82.4889	1.28437
					83.2	1.28519
					83.9111	1.286
					84.6222	1.28619
					85.3333	1.28628
					86.0444	1.28638
					86.7555	1.28647
					87.4667	1.28804
					88.1778	1.29039
					88.8889	1.29276
					89.6	1.29515
					90.3111	1.29879
					91.0222	1.30412
					91.7333	1.30955
					92.4445	1.31509
					93.1556	1.32056

## Sheet: Fig 1F
	Absolute growth rate mg per h = First derivative of LOWESS line of best fit in Fig 1A [with 6th order smoothing (12 neighbors)]
time ALH (h)	Female	Male
0.355556	0.000489784	0.000572442
1.06667	0.000515377	0.000596295
1.77778	0.000547602	0.000627541
2.48889	0.000584712	0.000664241
3.2	0.000623928	0.000703329
3.91111	0.000657167	0.000735894
4.62222	0.000704523	0.000784151
5.33333	0.000762063	0.000843789
6.04444	0.000826803	0.000911547
6.75556	0.000879873	0.000973414
7.46667	0.000952789	0.00105058
8.17778	0.00104281	0.00114055
8.88889	0.00114446	0.00123901
9.6	0.00124526	0.00133471
10.3111	0.00135476	0.00143716
11.0222	0.00147476	0.00154836
11.7333	0.00159873	0.00166231
12.4444	0.00173316	0.00178575
13.1556	0.00187289	0.00191332
13.8667	0.00201393	0.00204011
14.5778	0.0021531	0.00216338
15.2889	0.00229208	0.00228506
16	0.00243003	0.00240445
16.7111	0.00256171	0.00251689
17.4222	0.00268436	0.00261957
18.1333	0.00279713	0.00271254
18.8444	0.00285854	0.00276514
19.5556	0.00296226	0.0028483
20.2667	0.00309026	0.00294724
20.9778	0.00323063	0.00305284
21.6889	0.00334452	0.00313737
22.4	0.00350561	0.00326282
23.1111	0.00371534	0.00343137
23.8222	0.00395116	0.00362464
24.5333	0.0041748	0.00380709
25.2444	0.00444783	0.00402959
25.9556	0.00482828	0.00433888
26.6667	0.00528312	0.0047077
27.3778	0.00579497	0.00512323
28.0889	0.00635144	0.00557589
28.8	0.00697104	0.00608348
29.5111	0.00763533	0.00663061
30.2222	0.0083206	0.00719873
30.9333	0.00898382	0.00775897
31.6444	0.00971875	0.00836341
32.3556	0.010498	0.00899347
33.0667	0.0112979	0.00963262
33.7778	0.0120991	0.010256
34.4889	0.0128741	0.0108661
35.2	0.0136001	0.0114439
35.9111	0.0142547	0.0119695
36.6222	0.0147973	0.0124095
37.3333	0.0153813	0.0128806
38.0444	0.0160539	0.0134175
38.7556	0.0167477	0.0139658
39.4667	0.0174201	0.0144954
40.1778	0.0181203	0.0150473
40.8889	0.0189829	0.0157334
41.6	0.0199163	0.0164789
42.3111	0.0209313	0.0172787
43.0222	0.0219911	0.018097
43.7333	0.0232932	0.019162
44.4444	0.0247559	0.0203948
45.1556	0.0263318	0.0217506
45.8667	0.0279172	0.0231494
46.5778	0.0296541	0.0246842
47.2889	0.0314725	0.0262994
48	0.0333321	0.0279597
48.7111	0.0352863	0.0297483
49.4222	0.0372654	0.0314925
50.1333	0.0392389	0.0331575
50.8444	0.0411724	0.0347283
51.5556	0.0428584	0.0361333
52.2667	0.0445004	0.0374439
52.9778	0.0462016	0.0386898
53.6889	0.0478278	0.0397907
54.4	0.0495932	0.0409681
55.1111	0.0513803	0.0421157
55.8222	0.0529589	0.0429515
56.5333	0.0542689	0.0434563
57.2444	0.0555201	0.0437904
57.9556	0.0568947	0.0440421
58.6667	0.0578683	0.0440952
59.3778	0.0584512	0.0439109
60.0889	0.0587502	0.04357
60.8	0.0590164	0.0433206
61.5111	0.0591167	0.0430134
62.2222	0.0590404	0.0426391
62.9333	0.05878	0.0421951
63.6444	0.0585667	0.0418103
64.3556	0.0582499	0.0414679
65.0667	0.0578127	0.0411918
65.7778	0.0572541	0.0409919
66.4889	0.0565821	0.0407369
67.2	0.0557757	0.0404827
67.9111	0.0548102	0.0403793
68.6222	0.0536076	0.0399479
69.3333	0.0525795	0.039424
70.0444	0.0518022	0.0388997
70.7556	0.0508927	0.0383421
71.4667	0.0499532	0.0378295
72.1778	0.0490097	0.0372887
72.8889	0.0482186	0.0367182
73.6	0.0472344	0.0359079
74.3111	0.0461978	0.03492
75.0222	0.0451369	0.0337995
75.7333	0.0439697	0.0327246
76.4444	0.0424808	0.0314269
77.1556	0.0406979	0.0299263
77.8667	0.0387038	0.0282793
78.5778	0.0367352	0.0267226
79.2889	0.0345725	0.0249813
80	0.0321219	0.0229236
80.7111	0.0294903	0.0206424
81.4222	0.0267834	0.0183883
82.1333	0.0239986	0.0161281
82.8444	0.0209831	0.0136333
83.5556	0.0178428	0.0110491
84.2667	0.0147072	0.00854114
84.9778	0.011714	0.00621374
85.6889	0.00867081	0.00349143
86.4	0.00573846	0.000686261
87.1111	0.00289132	-0.00215007
87.8222	-5.71484e-05	-0.0049979
88.5333	-0.00286206	-0.00775925
89.2444	-0.00542575	-0.0103563
89.9556	-0.00768666	-0.0127371
90.6667	-0.0100408	-0.0151712
91.3778	-0.0122025	-0.0174487
92.0889	-0.0140919	-0.0195031
92.8	-0.0156052	-0.0212501
93.5111	-0.0171671	-0.0229614
94.2222	-0.0185707	-0.0244736
94.9333	-0.0197178	-0.0256898
95.6444	-0.0205196	-0.0265091

## Sheet: Fig 1G
	mean body mass (mg) - LOWESS calculated line of best fit (from Fig 1A)			fold growth over 8h intervals				plotted in Fig 1G data points every 3h:
time ALH (h)	F	M		time ALH (midpoint of time window)	F	M		time ALH (midpoint of time window)	F	M
0	0.0101785	0.00974879		4	1.51089	1.59542		4.5	1.60079	1.69619
0.5	0.0103731	0.00998757		4.5	1.52666	1.60646		10.5	1.85175	1.92574
1	0.0105677	0.0102263		5	1.54184	1.61698		16.5	2.18307	2.1358
1.5	0.0107623	0.0104651		5.5	1.56815	1.64098		22.5	1.9013	1.83289
2	0.0109569	0.0107039		6	1.59352	1.66391		28.5	2.02214	1.90663
2.5	0.0111514	0.0109427		6.5	1.61801	1.68585		34.5	2.44457	2.28368
3	0.011346	0.0111815		7	1.64166	1.70684		40.5	2.06242	1.96966
3.5	0.0117131	0.0115827		7.5	1.63999	1.70274		46.5	1.99953	1.94012
4	0.0120803	0.0119839		8	1.63842	1.69891		52.5	2.06499	2.05512
4.5	0.0124474	0.0123851		8.5	1.66102	1.72204		58.5	1.8033	1.73026
5	0.0128145	0.0127863		9	1.68232	1.74373		64.5	1.55529	1.46027
5.5	0.0131816	0.0131876		9.5	1.70243	1.76409		70.5	1.32841	1.32751
6	0.0135487	0.0135888		10	1.72145	1.78325		76.5	1.23707	1.22206
6.5	0.0140062	0.0140799		10.5	1.72824	1.7898		82.5	1.10363	1.09493
7	0.0144637	0.0145711		11	1.73461	1.79592		88.5	0.986335	0.957352
7.5	0.0149212	0.0150623		11.5	1.77242	1.82354
8	0.0153787	0.0155534		12	1.80798	1.84943
8.5	0.0158362	0.0160446		12.5	1.84149	1.87372
9	0.0162937	0.0165358		13	1.87312	1.89658
9.5	0.0168768	0.0171731		13.5	1.88885	1.90179
10	0.01746	0.0178104		14	1.90353	1.90663
10.5	0.0180432	0.0184477		14.5	1.93413	1.92683
11	0.0186263	0.019085		15	1.96281	1.94568
11.5	0.0192095	0.0197223		15.5	1.98976	1.96331
12	0.0197926	0.0203596		16	2.01511	1.97983
12.5	0.0206753	0.0213277		16.5	2.00947	1.9644
13	0.021558	0.0222959		17	2.00429	1.95031
13.5	0.0224407	0.023264		17.5	2.0001	1.93661
14	0.0233234	0.0242322		18	1.99623	1.92401
14.5	0.0242061	0.0252003		18.5	1.99264	1.91238
15	0.0250888	0.0261685		19	1.9893	1.9016
15.5	0.0264466	0.0274667		19.5	1.95051	1.86887
16	0.0278044	0.0287649		20	1.9155	1.83909
16.5	0.0291622	0.0300632		20.5	1.88308	1.81145
17	0.03052	0.0313614		21	1.85354	1.7861
17.5	0.0318778	0.0326596		21.5	1.82651	1.76276
18	0.0332356	0.0339579		22	1.80169	1.74121
18.5	0.0348978	0.0355455		22.5	1.76331	1.70723
19	0.03656	0.0371332		23	1.72842	1.67616
19.5	0.0382221	0.0387209		23.5	1.72982	1.67312
20	0.0398843	0.0403085		24	1.73109	1.67033
20.5	0.0415464	0.0418962		24.5	1.73227	1.66774
21	0.0432086	0.0434839		25	1.73335	1.66535
21.5	0.0448837	0.0450534		25.5	1.73386	1.66379
22	0.0465589	0.046623		26	1.73432	1.66233
22.5	0.048234	0.0481925		26.5	1.76721	1.68898
23	0.0499092	0.0497621		27	1.7979	1.71395
23.5	0.0515843	0.0513316		27.5	1.82659	1.73739
24	0.0532595	0.0529012		28	1.85347	1.75944
24.5	0.0549147	0.0544579		28.5	1.8794	1.78064
25	0.05657	0.0560145		29	1.90381	1.80066
25.5	0.0582252	0.0575712		29.5	1.97154	1.85624
26	0.0598805	0.0591279		30	2.03553	1.90889
26.5	0.0615358	0.0606845		30.5	2.09608	1.95883
27	0.063191	0.0622412		31	2.15345	2.00628
27.5	0.0661172	0.0647848		31.5	2.16546	2.02016
28	0.0690434	0.0673284		32	2.17645	2.03299
28.5	0.0719696	0.0698721		32.5	2.19709	2.05467
29	0.0748957	0.0724157		33	2.21612	2.07482
29.5	0.0778219	0.0749593		33.5	2.23371	2.0936
30	0.0807481	0.077503		34	2.25003	2.11116
30.5	0.0852398	0.0813963		34.5	2.22361	2.09231
31	0.0897315	0.0852897		35	2.19983	2.07519
31.5	0.0942232	0.0891831		35.5	2.19498	2.06977
32	0.0987149	0.0930765		36	2.19056	2.0648
32.5	0.103207	0.0969699		36.5	2.18652	2.06023
33	0.107698	0.100863		37	2.18283	2.05602
33.5	0.114793	0.106866		37.5	2.13	2.01162
34	0.121889	0.112868		38	2.08332	1.97194
34.5	0.128984	0.118871		38.5	2.04106	1.93831
35	0.136079	0.124873		39	2.00321	1.90791
35.5	0.143174	0.130876		39.5	1.96911	1.88031
36	0.150269	0.136878		40	1.93823	1.85512
36.5	0.158123	0.143564		40.5	1.90097	1.82333
37	0.165978	0.15025		41	1.86723	1.79437
37.5	0.173832	0.156935		41.5	1.86267	1.79031
38	0.181686	0.163621		42	1.85851	1.78658
38.5	0.18954	0.170306		42.5	1.8547	1.78314
39	0.197395	0.176992		43	1.85119	1.77996
39.5	0.206818	0.184588		43.5	1.83392	1.76825
40	0.216241	0.192184		44	1.81817	1.75746
40.5	0.225664	0.199781		44.5	1.82687	1.7691
41	0.235087	0.207377		45	1.83488	1.77989
41.5	0.24451	0.214973		45.5	1.84227	1.78992
42	0.253933	0.222569		46	1.84912	1.79926
42.5	0.263264	0.230408		46.5	1.85612	1.80608
43	0.272595	0.238247		47	1.86265	1.81245
43.5	0.281926	0.246087		47.5	1.88613	1.8396
44	0.291257	0.253926		48	1.90812	1.86507
44.5	0.300587	0.261765		48.5	1.92873	1.88901
45	0.309918	0.269604		49	1.94811	1.91157
45.5	0.323792	0.280963		49.5	1.93877	1.90863
46	0.337666	0.292322		50	1.93019	1.90593
46.5	0.35154	0.303681		50.5	1.92992	1.90982
47	0.365414	0.315039		51	1.92968	1.91343
47.5	0.379288	0.326398		51.5	1.92945	1.91679
48	0.393162	0.337757		52	1.92924	1.91992
48.5	0.41226	0.353433		52.5	1.9046	1.89937
49	0.431357	0.369108		53	1.88214	1.88056
49.5	0.450455	0.384784		53.5	1.8621	1.85857
50	0.469552	0.40046		54	1.84369	1.83831
50.5	0.48865	0.416135		54.5	1.82672	1.81957
51	0.507748	0.431811		55	1.81103	1.80219
51.5	0.531749	0.4527		55.5	1.77991	1.76546
52	0.555751	0.473588		56	1.75147	1.73197
52.5	0.579753	0.494477		56.5	1.73701	1.70726
53	0.603755	0.515366		57	1.7237	1.68456
53.5	0.627757	0.536255		57.5	1.71141	1.66362
54	0.651759	0.557143		58	1.70002	1.64425
54.5	0.678445	0.579975		58.5	1.68276	1.62084
55	0.705131	0.602806		59	1.6668	1.5992
55.5	0.731816	0.625637		59.5	1.64869	1.5721
56	0.758502	0.648468		60	1.63185	1.54691
56.5	0.785188	0.671299		60.5	1.61616	1.52344
57	0.811874	0.69413		61	1.60149	1.50151
57.5	0.838792	0.715149		61.5	1.58732	1.48473
58	0.86571	0.736168		62	1.57404	1.46891
58.5	0.892629	0.757186		62.5	1.55481	1.45376
59	0.919547	0.778205		63	1.5367	1.43942
59.5	0.946465	0.799223		63.5	1.51963	1.42585
60	0.973383	0.820242		64	1.5035	1.41296
60.5	1.00704	0.844202		64.5	1.47828	1.39584
61	1.04069	0.868163		65	1.4547	1.37967
61.5	1.07435	0.892123		65.5	1.43259	1.36436
62	1.108	0.916084		66	1.41182	1.34985
62.5	1.14166	0.940044		66.5	1.39228	1.33609
63	1.17532	0.964005		67	1.37386	1.323
63.5	1.20654	0.983564		67.5	1.3592	1.31642
64	1.23776	1.00312		68	1.34527	1.31009
64.5	1.26899	1.02268		68.5	1.33122	1.30481
65	1.30021	1.04224		69	1.31784	1.29973
65.5	1.33143	1.0618		69.5	1.30509	1.29483
66	1.36266	1.08136		70	1.29293	1.29011
66.5	1.38786	1.10077		70.5	1.28686	1.28574
67	1.41307	1.12017		71	1.28102	1.28152
67.5	1.43828	1.13957		71.5	1.27537	1.27745
68	1.46348	1.15897		72	1.26992	1.27352
68.5	1.48869	1.17837		72.5	1.26439	1.26413
69	1.51389	1.19777		73	1.25904	1.25505
69.5	1.5391	1.21718		73.5	1.25386	1.24626
70	1.56431	1.23658		74	1.24885	1.23775
70.5	1.58951	1.25598		74.5	1.24019	1.22864
71	1.61472	1.27538		75	1.2318	1.21981
71.5	1.63992	1.29478		75.5	1.22367	1.21124
72	1.66513	1.31419		76	1.21579	1.20292
72.5	1.6893	1.33441		76.5	1.20888	1.19412
73	1.71347	1.35463		77	1.20216	1.18557
73.5	1.73765	1.37485		77.5	1.19196	1.17401
74	1.76182	1.39508		78	1.18204	1.16279
74.5	1.78599	1.4153		78.5	1.17239	1.15189
75	1.81017	1.43552		79	1.16299	1.14129
75.5	1.83434	1.45574		79.5	1.15385	1.13099
76	1.85851	1.47597		80	1.14494	1.12097
76.5	1.88228	1.48962		80.5	1.13297	1.11309
77	1.90605	1.50327		81	1.12131	1.10534
77.5	1.92982	1.51692		81.5	1.10993	1.09774
78	1.95359	1.53058		82	1.09883	1.09028
78.5	1.9713	1.54315		82.5	1.09133	1.0837
79	1.98902	1.55572		83	1.08397	1.07723
79.5	2.00673	1.56829		83.5	1.07335	1.06598
80	2.02445	1.58087		84	1.06292	1.0549
80.5	2.04216	1.59344		84.5	1.05267	1.044
81	2.05988	1.60601		85	1.0426	1.03327
81.5	2.07121	1.61409		85.5	1.03588	1.02555
82	2.08255	1.62218		86	1.02923	1.01791
82.5	2.09388	1.63026		86.5	1.02011	1.00599
83	2.10521	1.63835		87	1.01108	0.994178
83.5	2.11655	1.64643		87.5	1.00216	0.982486
84	2.12788	1.65452		88	0.993325	0.970907
84.5	2.13257	1.65808		88.5	0.987652	0.962061
85	2.13727	1.66163		89	0.982003	0.953252
85.5	2.14196	1.66519		89.5	0.974425	0.942536
86	2.14665	1.66875		90	0.96688	0.931865
86.5	2.15135	1.67231		90.5	0.959367	0.92124
87	2.15604	1.67587		91	0.951888	0.910659
87.5	2.15394	1.67176		91.5	0.947421	0.90425
88	2.15183	1.66766		92	0.942945	0.89781
88.5	2.14973	1.66355
89	2.14763	1.65945
89.5	2.14552	1.65534
90	2.14342	1.65124
90.5	2.13598	1.64002
91	2.12855	1.62881
91.5	2.12111	1.6176
92	2.11367	1.60638
92.5	2.10624	1.59517
93	2.0988	1.58396
93.5	2.08718	1.5695
94	2.07555	1.55505
94.5	2.06393	1.5406
95	2.05231	1.52614
95.5	2.04068	1.51169
96	2.02906	1.49724

## Sheet: Fig 2C
body mass (mg) of individual wL3 larvae
sxlM1Δ33/Y	sxlM1Δ33/Y ; ; Sxl+tCa/+	sxlf7,M1/Binscinscy	sxlf7,M1/Binscinscy ; ; Sxl+tCa/+	sxlM1Δ33/sxlf7,M1	sxlM1Δ33/sxlf7,M1; ; Sxl+TCa/+
1.57	1.575	1.555	1.422	1.396	1.957
1.604	1.58	1.571	1.839	1.5	2.029
1.512	1.49	1.676	1.985	1.458	2.041
1.493	1.386	1.854	1.659	1.494	2.145
1.419	1.494	1.591	1.941	1.356	1.869
1.469	1.539	1.648	1.763	1.472	1.751
1.431	1.387	1.821		1.577	2.025
1.521	1.547	1.943		1.525	1.865
1.609	1.535	1.753			1.836
1.554	1.487	1.842			1.851
1.553	1.533	1.818			1.763
1.703	1.629	2.064			1.735
1.757	1.581	1.528			1.885
1.456	1.584	1.763			1.971
1.518	1.599	1.897
1.771	1.607	1.827
1.718	1.416	1.713
1.618	1.572	1.729
1.606	1.533	1.706
1.597		1.754
1.418		1.737
1.491		1.639
1.502		1.989
1.659		2.045
1.584		1.797
1.56		1.962
1.663		2.184
1.815		2.025
1.663		2.026
1.594		1.224
1.67		1.491
1.643		1.651
1.529		1.701
1.919		1.726
1.489		1.79
1.595		1.84
1.201		1.686
1.5		1.725
1.672		1.778
1.558		1.716
1.613		1.602
1.409		1.591
1.564		1.7
1.609		1.664
1.559		1.709
1.399		1.652
1.556		1.739
1.413
1.514

## Sheet: Fig 3A
body mass (mg) of individual wL3 larvae								F:M ratios (data shown for independent repeats)
elavc155>w1118 F	elavc155>w1118 M	elavc155>Sxl RNAi 1 F	elavc155>Sxl RNAi 1 M	elavc155>Sxl RNAi 2 F	elavc155>Sxl RNAi 2 M			ctrl	elavc155>Sxl RNAi 1	elavc155>Sxl RNAi 2
2.176	1.515	1.718	1.609	1.661	1.778			1.25	1.04	1.01
1.963	1.459	1.689	1.627	1.789	1.657			1.27	1.06029	1.03
1.905	1.822	1.647	1.704	1.598	1.649			1.27	1.03457	0.98
2.14	1.916	1.749	1.679	1.542	1.749			1.27963	1.02
1.953	1.74	1.75	1.593	1.47	1.738			1.289
2.168	1.635	1.793	1.631	1.768	1.596
2.129	1.578	1.739	1.619	1.676	1.636
2.22	1.698	1.608	1.7	1.834	1.558
1.977	1.723	1.45	1.585	1.546	1.682
2.02	1.467	1.497	1.486	1.673	1.678
2.081	1.475	1.565	1.728	1.972	1.803
2.019	1.485	1.555	1.673	1.685	1.643
1.92	1.7	1.538	1.389	1.414	1.959
	1.525	1.498	1.388	1.639	1.728
		1.578	1.428	1.508	1.765
		1.473	1.47	1.599	1.701
		1.584	1.48	1.835	1.635
		1.562	1.836	1.886	1.773
		1.634	1.387	1.699	1.728
		1.507	1.639	1.792	1.673
		1.458	1.43		1.671
		1.563	1.535		1.717
			1.394		1.776
			1.551		1.926
			1.318		1.703
			1.426		1.719
			1.489		1.523
			1.364		1.743
			1.609
			1.688
			1.471
			1.431
			1.46
			1.599
			1.493
			1.565
			1.751
			1.416

## Sheet: Fig 3B
body mass (mg) of individual wL3 larvae
F sxlf7,M1/Binscinscy	M sxlM1Δ33/Y	F Sxl[f7M1]/Sxl[M1D33]	F Sxl[f7M1]/Sxl[M1D33];; UAS-Sxl/+	F Sxl[f7M1]/Sxl[M1D33]; insc-G4/+	F Sxl[f7M1]/Sxl[M1D33]; insc-G4/UAS-TraF	F Sxl[f7M1]/Sxl[M1D33]; insc-G4/+; UAS-Sxl/+	F sxlM1Δ33/sxlf7,M1; ; Sxl+TCa/+
1.555	1.57	1.396	1.625	1.495	1.65	1.774	1.957
1.571	1.604	1.5	1.572	1.349	1.542	1.798	2.029
1.676	1.512	1.458	1.676	1.365	1.451	1.633	2.041
1.854	1.493	1.494	1.556	1.412	1.37	1.748	2.145
1.591	1.419	1.356	1.486	1.383	1.549	1.598	1.869
1.648	1.469	1.472	1.625	1.295		1.605	1.751
1.821	1.431	1.577	1.56	1.423		1.605	2.025
1.943	1.521	1.525	1.662	1.317		1.84	1.865
1.753	1.609		1.541	1.243		1.62	1.836
1.842	1.554		1.427	1.066		1.702	1.851
1.818	1.553		1.668	1.302		1.784	1.763
2.064	1.703		1.555	1.466		1.682	1.735
1.528	1.757		1.381	1.306			1.885
1.763	1.456		1.458	1.142			1.971
1.897	1.518		1.37	1.455
1.827	1.771			1.307
1.713	1.718			1.345
1.729	1.618
1.706	1.606
1.754	1.597
1.737	1.418
	1.491
	1.502
also plotted in Fig 2C

[truncated: 43 more sheets: Fig 3C, Fig 3D, Fig 3E, Fig 3F, Fig 4A, Fig 5A, Fig 5B, Fig 6A, Fig 6B, Fig 6C, Fig 6D, Fig 6E, S1A Fig, S1B Fig, S1C Fig, S1D Fig, S2 Fig, S3A Fig, S3B Fig, S3C Fig …]
